# Supplementary material
Source: PubMed Central journal article supplement (PMC3632923)
Supplement: AAC.02290-12_zac999101790so1.pdf [file AAC.02290-12_zac999101790so1.pdf]

1 **Supplemental Movies**

2 S1 Development of *Candida albicans* biofilms observed from a side view. (See  
3 also Figure 2, 3 and 5)

4 Development of *Candida albicans* biofilms without treatment (A) and treated  
5 with either MCFG (B) or FLCZ (C). Biofilms developed continuously; the silicon  
6 sides of the biofilms were dense (dark), and the flow sides consisted mainly of  
7 hyphae. Treatment with MCFG or FLCZ was commenced on 5-h-old biofilms.  
8 MCFG completely suppressed biofilm growth, while FLCZ only partially  
9 suppressed biofilm growth. A close view of biofilms and the moment of  
10 detachment (D) recorded at a rate of 30 frames per second. Prior to detachment,  
11 a cluster at the tip of the biofilm exhibited motion. Detachment seemed to occur  
12 passively by shear force. MCFG disrupted cells in the biofilms and string-like  
13 contents of cells (arrowheads) were released from a bursting cell (E and F).

14

15 S2 Development of *Candida parapsilosis* biofilms observed from a side view.  
16 (See also Figure 6 and 8)

17 Development of *Candida parapsilosis* biofilms without treatment (A) and

18 treated with either MCFG (B). Biofilms developed continuously; the silicon  
19 sides of the biofilms were dense (dark); but unlike *Candida albicans*, *Candida*  
20 *parapsilosis* did not form hyphae. Treatment with MCFG was commenced on  
21 5-h-old biofilms. MCFG completely suppressed biofilm growth. MCFG disrupted  
22 cells in the biofilms, and string-like contents of cells (arrowheads) were released  
23 from a bursting cell (C).

24
